# Supplementary material
Source: PubMed Central journal article supplement (PMC548959)
Supplement: pnas_102_7_2430__1.pdf [file pnas_102_7_2430__1.pdf]

**Table 1. International Nucleotide Sequence Database (INSD)/GenBank accession numbers for SARS-CoV sequences analyzed in the text**

| Serial no. | Sequence IDs | Host-phase | Regions used for analysis    | GenBank accession no. | Sampling date <sup>+</sup> |
|------------|--------------|------------|------------------------------|-----------------------|----------------------------|
| Pc1        | SZ3          | PC03       | Whole genome/S, sars3a, nsp3 | AY304486              | 07/05/2004                 |
| Pc2        | SZ16         | PC03       | Whole genome/S, sars3a, nsp3 | AY304488              | 07/05/2004                 |
| Pc3        | SZ1          | PC03       | S gene                       | AY304489              |                            |
| Pc4        | SZ13         | PC03       | S gene                       | AY304487              |                            |
| Pc5        | PC4-13       | PC04       | Whole genome/S, sars3a, nsp3 | AY613948              | 10/01/2004                 |
| Pc6        | PC4-136      | PC04       | Whole genome/S, sars3a, nsp3 | AY613949              | 05/01/2004                 |
| Pc7        | PC4-227      | PC04       | Whole genome/S, sars3a, nsp3 | AY613950              | 05/01/2004                 |
| Pc8        | PC4-127      | PC04       | S gene                       | AY613951              |                            |
| Pc9        | PC4-205      | PC04       | S gene                       | AY613952              |                            |
| Pc10       | PC4-115      | PC04       | S gene                       | AY627044              |                            |
| Pc11       | PC4-137      | PC04       | S gene                       | AY627045              |                            |
| Pc12       | PC4-145      | PC04       | S gene                       | AY627046              |                            |
| Pc13       | PC4-199      | PC04       | S gene                       | AY627047              |                            |
| Pc14       | PC4-241      | PC04       | S gene                       | AY627048              |                            |
| Hp1        | GD03T13*     | HP04       | S gene                       | AY525636              |                            |
| Hp2        | GZ03-01      | HP04       | Whole genome/S, sars3a, nsp3 | AY568539              | 22/12/2003                 |
| Hp3        | GZ03-02      | HP04       | Whole genome/S, sars3a, nsp3 | AY613947              | 05/01/2004                 |
| Hp4        | GZ03-03      | HP04       | S gene                       | AY613953              | 08/01/2004                 |
| Hp5        | GZ02         | HP03E      | Whole genome/S, sars3a, nsp3 | AY390556              | 11/02/2003                 |
| Hp6        | GD01         | HP03L      | Whole genome/S gene          | AY278489              |                            |
| Hp7        | HGZ8L1-A     | HP03E      | Whole genome/S gene          | AY394981              |                            |
| Hp8        | ZS-C         | HP03E      | Whole genome/S gene          | AY395003              |                            |
| Hp9        | ZS-B         | HP03E      | Whole genome/S gene          | AY394996              |                            |
| Hp10       | ZS-A         | HP03E      | Whole genome/S, sars3a, nsp3 | AY394997              |                            |
| Hp11       | HSZ-A        | HP03E      | Whole genome/S gene          | AY394984              |                            |
| Hp12       | HSZ-Bb       | HP03E      | Whole genome/S gene          | AY394985              |                            |
| Hp13       | HSZ-Cc       | HP03E      | Whole genome/S gene          | AY394995              |                            |
| Hp14       | HSZ-Cb       | HP03E      | Whole genome/S gene          | AY394986              |                            |
| Hp15       | HSZ-Bc       | HP03E      | Whole genome/S, sars3a, nsp3 | AY394994              |                            |
| Hp16       | HGZ8L1-B     | HP03E      | Whole genome/S gene          | AY394982              |                            |
| Hp17       | GZ50         | HP03M      | Whole genome/S gene          | AY304495              |                            |
| Hp18       | GZ-A         | HP03M      | Whole genome/S gene          | AY394977              |                            |
| Hp19       | JMD          | HP03M      | Whole genome/S gene          | AY394988              |                            |
| Hp20       | BJ03         | HP03M      | Whole genome/S gene          | AY278490              |                            |
| Hp21       | BJ02         | HP03M      | Whole genome/S gene          | AY278487              |                            |
| Hp22       | BJ01         | HP03M      | Whole genome/S gene          | AY278488              |                            |
| Hp23       | CUHK-W1      | HP03M      | Whole genome/S gene          | AY278554              |                            |

|      |              |       |                     |          |            |
|------|--------------|-------|---------------------|----------|------------|
| Hp24 | HZS2-Bb      | HP03M | Whole genome/S gene | AY395004 |            |
| Hp25 | HZS2-A       | HP03M | Whole genome/S gene | AY394983 |            |
| Hp26 | HZS2-D       | HP03M | Whole genome/S gene | AY394989 |            |
| Hp27 | HZS2-E       | HP03M | Whole genome/S gene | AY394990 |            |
| Hp28 | HZS2-C       | HP03M | Whole genome/S gene | AY394992 |            |
| Hp29 | HGZ8L-2      | HP03M | Whole genome/S gene | AY394993 |            |
| Hp30 | HZS2-Fc      | HP03M | Whole genome/S gene | AY394991 |            |
| Hp31 | HZS2-Fb      | HP03M | Whole genome/S gene | AY394987 |            |
| Hp32 | BJ04         | HP03M | Whole genome/S gene | AY279354 |            |
| Hp33 | NS-1         | HP03M | Whole genome/S gene | AY508724 |            |
| Hp34 | FRA          | HP03L | Whole genome/S gene | AY310120 |            |
| Hp35 | SoD          | HP03L | Whole genome/S gene | AY461660 |            |
| Hp36 | ShanghaiQXC1 | HP03L | Whole genome/S gene | AY463059 |            |
| Hp37 | GZ-B         | HP03L | Whole genome/S gene | AY394978 |            |
| Hp38 | GZ-D         | HP03L | Whole genome        | AY394980 |            |
| Hp39 | GZ-C         | HP03L | Whole genome/S gene | AY394979 |            |
| Hp40 | TOR2         | HP03L | Whole genome/S gene | AY274119 |            |
| Hp41 | TC1          | HP03L | Whole genome/S gene | AY338174 |            |
| Hp42 | TC2          | HP03L | Whole genome/S gene | AY338175 |            |
| Hp43 | TC3          | HP03L | Whole genome/S gene | AY348314 |            |
| Hp44 | URBANI       | HP03L | Whole genome/S gene | AY278741 |            |
| Hp45 | AS           | HP03L | Whole genome/S gene | AY427439 |            |
| Hp46 | WHU          | HP03L | Whole genome/S gene | AY394850 |            |
| Hp47 | CUHK-SU10    | HP03L | Whole genome/S gene | AY282752 |            |
| Hp48 | FRANKFURT    | HP03L | Whole genome/S gene | AY291315 |            |
| Hp49 | HKU-39849    | HP03L | Whole genome/S gene | AY278491 |            |
| Hp50 | A11S         | HP03L | Whole genome/S gene | AY345986 | 15/03/2003 |
| Hp51 | A7N          | HP03L | Whole genome/S gene | AY345987 | 23/03/2003 |
| Hp52 | STL2         | HP03L | Whole genome/S gene | AY345988 |            |
| Hp53 | TW1          | HP03L | Whole genome/S gene | AY291451 |            |
| Hp54 | TW2          | HP03L | Whole genome/S gene | AY502925 |            |
| Hp55 | TW3          | HP03L | Whole genome/S gene | AY502926 |            |
| Hp56 | TW4          | HP03L | Whole genome/S gene | AY502927 |            |
| Hp57 | TW5          | HP03L | Whole genome/S gene | AY502928 |            |
| Hp58 | TW6          | HP03L | Whole genome/S gene | AY502929 |            |
| Hp59 | TW7          | HP03L | Whole genome/S gene | AY502930 |            |
| Hp60 | TW8          | HP03L | Whole genome/S gene | AY502931 |            |
| Hp61 | TW9          | HP03L | Whole genome/S gene | AY502932 |            |
| Hp62 | TW10         | HP03L | Whole genome/S gene | AY502923 |            |
| Hp63 | TW11         | HP03L | Whole genome/S gene | AY502924 |            |
| Hp64 | TWC          | HP03L | Whole genome/S gene | AY321118 |            |

|      |          |       |                     |          |  |
|------|----------|-------|---------------------|----------|--|
| Hp65 | TWH      | HP03L | Whole genome/S gene | AP006557 |  |
| Hp66 | TWJ      | HP03L | Whole genome/S gene | AP006558 |  |
| Hp67 | TWK      | HP03L | Whole genome/S gene | AP006559 |  |
| Hp68 | TWS      | HP03L | Whole genome/S gene | AP006560 |  |
| Hp69 | TWY      | HP03L | Whole genome/S gene | AP006561 |  |
| Hp70 | GD69     | HP03L | Whole genome/S gene | AY313906 |  |
| Hp71 | HSR      | HP03L | Whole genome/S gene | AY323977 |  |
| Hp72 | Sino1-11 | HP03L | Whole genome/S gene | AY485277 |  |
| Hp73 | Sino3-11 | HP03L | Whole genome/S gene | AY485278 |  |
| Hp74 | Sin850   | HP03L | Whole genome/S gene | AY559096 |  |
| Hp75 | Sin849   | HP03L | Whole genome/S gene | AY559086 |  |
| Hp76 | Sin847   | HP03L | Whole genome/S gene | AY559095 |  |
| Hp77 | Sin848   | HP03L | Whole genome/S gene | AY559085 |  |
| Hp78 | Sin845   | HP03L | Whole genome/S gene | AY559093 |  |
| Hp79 | Sin852   | HP03L | Whole genome/S gene | AY559082 |  |
| Hp80 | SIN2774  | HP03L | Whole genome/S gene | AY283798 |  |
| Hp81 | SIN2748  | HP03L | Whole genome/S gene | AY283797 |  |
| Hp82 | SIN2677  | HP03L | Whole genome/S gene | AY283795 |  |
| Hp83 | SIN2500  | HP03L | Whole genome/S gene | AY283794 |  |
| Hp84 | Sin3765V | HP03L | Whole genome/S gene | AY559084 |  |
| Hp85 | PUMC01   | HP03L | Whole genome/S gene | AY350750 |  |
| Hp86 | PUMC02   | HP03L | Whole genome/S gene | AY357075 |  |
| Hp87 | PUMC03   | HP03L | Whole genome/S gene | AY357076 |  |
| Hp88 | SIN2679  | HP03L | Whole genome/S gene | AY283796 |  |
| Hp89 | CUHK-LC1 | HP03L | Whole genome/S gene | AY394998 |  |
| Hp90 | CUHK-LC2 | HP03L | Whole genome/S gene | AY394999 |  |
| Hp91 | CUHK-LC3 | HP03L | Whole genome/S gene | AY395000 |  |
| Hp92 | CUHK-LC4 | HP03L | Whole genome/S gene | AY395001 |  |
| Hp93 | CUHK-LC5 | HP03L | Whole genome/S gene | AY395002 |  |

\*The *S* gene sequence of the index patient (the first patient) of the 2003/2004 Guangzhou outbreak is the same as part of the whole genome sequence (GZ03-01) from the sample of the same patient.

<sup>†</sup>Only samples used for estimating the neutral mutation rate and the date for the most recent common ancestor (MRCA) are labeled with their sampling dates.
